# Supplementary material
Source: PubMed Central journal article supplement (PMC4793683)
Supplement: trof016555.ww1_default.pdf [file trof016555.ww1_default.pdf]

## Supplementary files

Figure. Gestational age at A/H1N1 pandemic vaccine administration by date of vaccination (n= 6246).

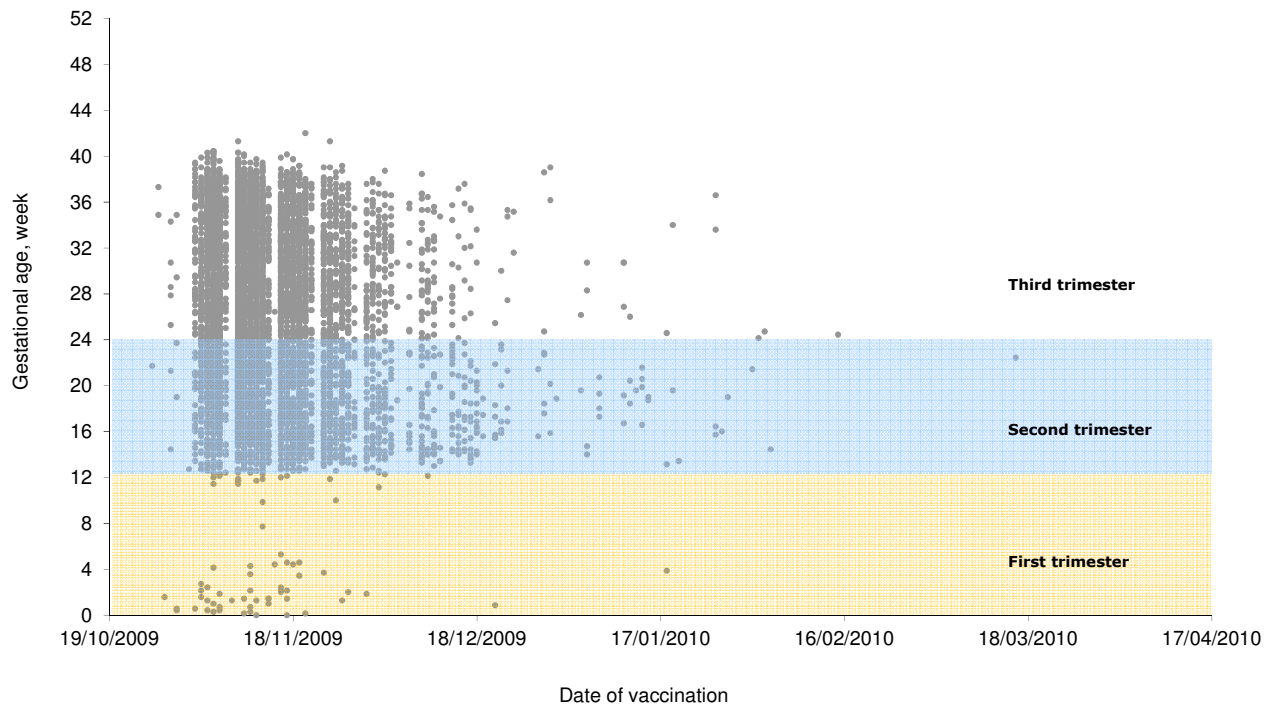

**Table A. Descriptions of exclusions for congenital viral infections and chromosomal anomalies**

| <b>Disease</b>              | <b>ICD-9 codes</b> | <b>Excluded cases (n)</b> |
|-----------------------------|--------------------|---------------------------|
| Congenital viral infections | 7710; 7711; 7712   | 60                        |
| Down syndrome               | 7580               | 64                        |
| Patau syndrome              | 7581               | 3                         |
| Edward syndrome             | 7582               | 4                         |
| Other autosomic anomalies   | 7585               | 3                         |
| Turner syndrome             | 7586               | 4                         |
| Klinefelter syndrome        | 7587               | 6                         |
| Other chromosomal anomalies | 7589               | 11                        |
| Autosomic translocation     | 7584               | 3                         |

**Table B. Outcome definition and source of information. Hospital Discharge (HD); Drug Prescription (DP); Birth Registry (BR)**

| Outcome                                        | Definition                                                                                                                                                                                                            | Source   |
|------------------------------------------------|-----------------------------------------------------------------------------------------------------------------------------------------------------------------------------------------------------------------------|----------|
| Pre-eclampsia/Eclampsia                        | ICD9: 642.x; ATC: C02-03; C07-09 (without hospitalization or drug use prior the pregnancy onset + 4 gestational weeks)                                                                                                | HD or DP |
| Gestational diabetes                           | ICD9: 648.8, 648.03; ATC: A10 (without hospitalization or drug use prior the pregnancy onset + 4 gestational weeks)                                                                                                   | HD or DP |
| In-hospital maternal death                     | Dead in hospital during labour or delivery (Yes/No)                                                                                                                                                                   | HD       |
| Admission to ICU                               | Transfer of mother to ICU (Yes/No)                                                                                                                                                                                    | HD       |
| Type of delivery                               | Spontaneous delivery vs other modes of delivery (i.e. caesarean, forceps, vacuum, other mode)                                                                                                                         | BR       |
| Stillbirth                                     | Yes/No                                                                                                                                                                                                                | BR       |
| In-hospital neonatal death                     | In hospital neonatal death within 7 days from delivery (Yes/No)                                                                                                                                                       | HD       |
| Perinatal death                                | Stillbirth or in hospital neonatal death                                                                                                                                                                              | BR or HD |
| Small for gestational age (SGA)                | live newborns with birth weight below the 10th percentile for their gestational age within the cohort of live births only. Birth weight (in grams) was retrieved from BR.                                             | BR       |
| Admission to neonatal ICU                      | Transfer of newborn to neonatal ICU (Yes/No)                                                                                                                                                                          | HD       |
| Occurrence of neonatal reanimation             | Yes/No                                                                                                                                                                                                                | BR       |
| Composite outcome                              | Very low 5-minute Apgar score ( $\leq 3$ ) or Acute respiratory distress syndrome (ICD9: 769) or Asphyxia (ICD9: 768.x) or Intraventricular hemorrhage (ICD9: 772.1) or Acute necrotizing enterocolitis (ICD9: 777.5) | BR or HD |
| Congenital Malformations (including subgroups) | ICD-9 codes reported in the EUROCAT guidelines                                                                                                                                                                        | BR or HD |

**Table C. Definition of confounders and source of information.**

| Outcome                                                           | Definition                                                                                                     | Source <sup>^</sup> | Confounding categories <sup>^^</sup> |
|-------------------------------------------------------------------|----------------------------------------------------------------------------------------------------------------|---------------------|--------------------------------------|
| <b>Demographics, socio-economic status, and pregnancy history</b> |                                                                                                                |                     |                                      |
| Hospital size                                                     | Quartile distribution of deliveries occurred in the hospitals of the Lombardy Region                           | BR                  | D                                    |
| Age                                                               | Age at delivery                                                                                                | BR                  | D                                    |
| Nationality                                                       | Nationality of the mother: Italian or non-Italian                                                              | BR                  | D                                    |
| Study degree                                                      | The highest between mother and father among three categories (i.e. University; High school; Elementary school) | BR                  | SES                                  |
| Mother occupational status                                        | Mother occupational status, i.e. Employed; Unemployed; Housewife; Student                                      | BR                  | SES                                  |
| Civil Status                                                      | Mother's civil status: single; married; separate; not declared.                                                | BR                  | SES                                  |
| Father occupational status                                        | Father occupational status: Employed; Unemployed; Other                                                        | BR                  | SES                                  |
| Consanguinity between parents                                     | Relationships by a common ancestor: 0 = no, 1= yes (relations from IV to VI degrees)                           | BR                  | SES                                  |
| Low income allowance                                              | Allowance codes = E01, E02, E04, E05                                                                           | CI                  | SES                                  |
| Previous conceptions                                              | Yes/No                                                                                                         | BR                  | PH                                   |
| Previous delivery(ies)                                            | Number of previous delivery(ies)                                                                               | BR                  | PH                                   |
| Live birth (from previous delivery)                               | Number of previous live birth(s)                                                                               | BR                  | PH                                   |
| Stillbirth (from previous delivery)                               | Number of previous stillbirth(s)                                                                               | BR                  | PH                                   |
| Spontaneous abortion                                              | Number of previous spontaneous abortion(s)                                                                     | BR                  | PH                                   |
| Voluntary abortion                                                | Number of previous voluntary abortion(s)                                                                       | BR                  | PH                                   |
| Caesarean delivery                                                | Number of previous caesarean delivery(ies)                                                                     | BR                  | PH                                   |

<sup>^</sup> Source of data: Hospital Discharge (HD); Drug Prescription (DP); Birth Registry (BR); Clinical Investigation (CI).

<sup>^^</sup> Confounding categories: Demographics (D); Socio-economic status (SES); Pregnancy history (PH); Comorbidity and Medication (C&M); Health care utilization (HC).

**Table C cont.**

| Outcome                                                                                                                                                                                                                                                                                         | Definition                                                                                                     | Source <sup>^</sup> | Confounding categories <sup>^^</sup> |
|-------------------------------------------------------------------------------------------------------------------------------------------------------------------------------------------------------------------------------------------------------------------------------------------------|----------------------------------------------------------------------------------------------------------------|---------------------|--------------------------------------|
| <b>Comorbidities, Medications, Risk Factors, and Health Care Utilization present before the pregnancy onset. Medication history was retrieved up to 6 months before the pregnancy onset; Hospitalization and disease allowance data were retrieved up to 1 year before the pregnancy onset.</b> |                                                                                                                |                     |                                      |
| Pulmonary diseases                                                                                                                                                                                                                                                                              | ICD9:490-496 or ATC=R03 or Allowance codes=007, 024                                                            | HD or DP or CI      | C&M                                  |
| Cardiovascular disease                                                                                                                                                                                                                                                                          | ICD9:390-459 or ATC=C01-03;C07-10;B01A or Allowance codes=021, 025, 031, A02, A31, D31                         | HD or DP or CI      | C&M                                  |
| Haematological disease                                                                                                                                                                                                                                                                          | ICD9:280-289                                                                                                   | HD                  | C&M                                  |
| Diabetes                                                                                                                                                                                                                                                                                        | ICD9:250 or ATC=A10 or Allowance codes =012, 013                                                               | HD or DP or CI      | C&M                                  |
| Neurological and psychiatric diseases                                                                                                                                                                                                                                                           | ICD9:290-319; 330-359 or ATC=N04, N05, N06DA, N06DX or Allowance codes =005, 011, 014, 017, 029, 038, 044, 046 | HD or DP or CI      | C&M                                  |
| Inflammatory bowel disease/Intestinal anti-inflammatory agents                                                                                                                                                                                                                                  | ICD9:555-558 or ATC=A07E                                                                                       | HD or DP            | C&M                                  |
| Immunosuppressive drugs                                                                                                                                                                                                                                                                         | ATC=L04A                                                                                                       | DP                  | C&M                                  |
| Antidepressants                                                                                                                                                                                                                                                                                 | ATC=N06A                                                                                                       | DP                  | C&M                                  |
| Antiepileptics                                                                                                                                                                                                                                                                                  | ATC=N03A                                                                                                       | DP                  | C&M                                  |
| Drugs for GERD                                                                                                                                                                                                                                                                                  | ATC=A02B                                                                                                       | DP                  | C&M                                  |
| Contraceptive drugs                                                                                                                                                                                                                                                                             | ATC=G03A                                                                                                       | DP                  | C&M                                  |
| Drugs for human fertilization                                                                                                                                                                                                                                                                   | ATC=G03G; G03D; H01AA; H01CC; L02AE                                                                            | DP                  | C&M                                  |
| NSAIDs                                                                                                                                                                                                                                                                                          | ATC=M01A; N02B                                                                                                 | DP                  | C&M                                  |
| Antibacterial for systemic use                                                                                                                                                                                                                                                                  | J01                                                                                                            | DP                  | C&M                                  |
| Thyroid diseases                                                                                                                                                                                                                                                                                | H03AA or Allowance codes=027, 035                                                                              | DP or CI            | C&M                                  |
| Folic acid (before the pregnancy onset)                                                                                                                                                                                                                                                         | ATC=B03BB                                                                                                      | DP                  | C&M                                  |
| Folic acid (during first trimester of pregnancy)                                                                                                                                                                                                                                                | ATC=B03BB                                                                                                      | DP                  | C&M                                  |
| Iron supplementation                                                                                                                                                                                                                                                                            | ATC=B03AA, B03AB, B03AC, B03AE                                                                                 | DP                  | C&M                                  |
| Autoimmune disease                                                                                                                                                                                                                                                                              | Allowance codes=003, 006, 009, 028, 030, 034, 036, 037, 047, 054, 056                                          | CI                  | C&M                                  |
| Immunodeficiency conditions                                                                                                                                                                                                                                                                     | Allowance codes=020, 048, 050, 052                                                                             | CI                  | C&M                                  |
| Rare diseases                                                                                                                                                                                                                                                                                   | Allowance codes=RAx, RBx, RCx, RDx, RFx, RGx, RIx, RJx, RLx, RMx, RNx                                          | CI                  | C&M                                  |
| Use of medically assisted reproduction (MPA) techniques                                                                                                                                                                                                                                         | Yes/No                                                                                                         | BR                  | C&M                                  |
| Type of MPA                                                                                                                                                                                                                                                                                     | Drugs; Intrauterine Insemination; Gamete transfer; In vitro fertilization; Sperm injection; Other              | BR                  | C&M                                  |
| Hospital admissions                                                                                                                                                                                                                                                                             | Number of hospitalizations                                                                                     | HD                  | HC                                   |
| Overall drug use                                                                                                                                                                                                                                                                                | Number of different substances used                                                                            | DP                  | HC                                   |

<sup>^</sup> Source of data: Hospital Discharge (HD); Drug Prescription (DP); Birth Registry (BR); Clinical Investigation (CI).

<sup>^^</sup> Confounding categories: Demographics (D); Socio-economic status (SES); Pregnancy history (PH); Comorbidity and Medication (C&M); Health care utilization (HC).

**Table D. Research in context (aOR: adjusted Odds Ratio; aHR: adjusted Hazard Ratio; aRR: adjusted Relative Risk; 95% Confidence Intervals are reported in brackets)**

|                                    | Country | Vaccine type                     | Total cohort | N. of vaccinated women | Gestational Diabetes           | Pre-eclampsia/Eclampsia        | Small for gestational age (SGA) | Congenital malformations (CMs) | Neonatal death                 | Stillbirth/Foetal death        |
|------------------------------------|---------|----------------------------------|--------------|------------------------|--------------------------------|--------------------------------|---------------------------------|--------------------------------|--------------------------------|--------------------------------|
| <b>Trotta 2013</b>                 | I       | MF59 adjuvanted                  | ca. 27 000   | 6131                   | <b>aOR 1.26</b><br>(1.04-1.53) | <b>aOR 1.19</b><br>(1.02-1.39) | <b>aOR 0.95</b><br>(0.86-1.04)  | <b>aOR 1.14</b><br>(0.99-1.31) | <b>aOR 1.04</b><br>(0.39-2.78) | <b>aOR 1.13</b><br>(0.65-1.95) |
| <b>Heikkinen<sup>1</sup> 2012</b>  | NL      | MF59 adjuvanted                  | 4508         | 2 295                  | aOR 0.48<br>(0.29-0.80)        | aOR 1.12<br>(0.81-1.55)        |                                 | aOR 1.33<br>(0.88-2.00)        | aOR 1.81<br>(0.16-20.23)       | aOR 1.44<br>(0.23-8.90)        |
| <b>Pasternak<sup>2</sup> 2012</b>  | DK      | AS03 adjuvanted                  | ca. 14 000   | ca. 7000               | -                              | -                              | aOR 0.97<br>(0.87-1.09)         | aOR 1.21^<br>(0.60-2.45)       | aOR 1.14<br>(0.94-1.38)        |                                |
| <b>Pasternak<sup>3</sup> 2012</b>  | DK      | AS03 adjuvanted                  | ca. 50 000   | ca. 7000               | -                              | -                              |                                 |                                |                                | aOR 0.44<br>(0.20-0.94)        |
| <b>Rubinstein<sup>4</sup> 2013</b> | RA      | MF59 adjuvanted                  | ca. 30 000   | 7293                   | -                              | -                              |                                 |                                | aOR 0.68^^<br>(0.42-1.06)      |                                |
| <b>Fell<sup>5</sup> 2012</b>       | CDN     | not reported                     | ca. 55 000   | 23 340                 |                                |                                | aRR 0.81<br>(0.72-0.92)         |                                |                                | aRR 0.66<br>(0.47-0.91)        |
| <b>Ludvigsson<sup>6</sup> 2013</b> | S       | AS03 adjuvanted                  | ca. 21 000   | 13 297                 |                                |                                | aOR 0.97<br>(0.90-1.05)         |                                |                                |                                |
| <b>Haberg<sup>7</sup> 2013</b>     | N       | AS03 adjuvanted + non adjuvanted | ca. 117 000  | ca. 50 000             |                                |                                |                                 |                                |                                | aHR 0.88<br>(0.66-1.17)        |
| <b>Richards<sup>8</sup> 2013</b>   | USA     | not reported                     | ca. 3300     | 1125                   |                                |                                | aOR 1.26<br>(0.94-1.69)         |                                |                                |                                |
| <b>Oppermann<sup>9</sup> 2012</b>  | D       | AS03 adjuvanted + non adjuvanted | ca. 1600     | 323                    |                                |                                |                                 | aOR 0.92<br>(0.58-1.46)        |                                |                                |
| <b>Conlin<sup>10</sup> 2013</b>    | USA     | not reported^^^                  | ca. 18 000   | 10 376                 |                                | aHR 1.10<br>(0.97-1.26)        |                                 | aOR 1.08<br>(0.87-1.35)        |                                |                                |
| <b>Kallen<sup>11</sup> 2012</b>    | S       | AS03 adjuvanted                  | ca 150 000   | 18 612                 | aOR 0.94<br>(0.81-1.09)        | aOR 0.99<br>(0.92-1.07)        | aOR 1.04<br>(0.92-1.17)         | aOR 1.01<br>(0.83-1.23)        |                                | aOR 0.77<br>(0.57-1.03)        |

^only on I trimester; 330 exposed

^^perinatal mortality

^^^H1N1 vaccine vs seasonal vaccine

## References Table D

1. Heikkinen T, Young J, van Beek E, et al. Safety of MF59-adjuvanted A/H1N1 influenza vaccine in pregnancy: a comparative cohort study. *Am J Obstet Gynecol* 2012;**207**:177.e1-8.
2. Pasternak B, Svanström H, Mølgaard-Nielsen D, et al. Vaccination against pandemic A/H1N1 2009 influenza in pregnancy and risk of fetal death: cohort study in Denmark. *BMJ* 2012;**344**:e2794.
3. Pasternak B, Svanström H, Mølgaard-Nielsen D, et al. Risk of adverse fetal outcomes following administration of a pandemic influenza A(H1N1) vaccine during pregnancy. *JAMA* 2012;**308**:165-74.
4. Rubinstein F, Micone P, Bonotti A, et al. EVA Study Research Group Estudio Embarazo y Vacuna Antigripal. Influenza A/H1N1 MF59 adjuvanted vaccine in pregnant women and adverse perinatal outcomes: multicentre study. *BMJ* 2013;**346**:f393.
5. Fell DB, Sprague AE, Liu N, et al. Better Outcomes Registry & Network (BORN) Ontario. H1N1 influenza vaccination during pregnancy and fetal and neonatal outcomes. *Am J Public Health* 2012;**102**:e33-40.
6. Ludvigsson JF, Zugna D, Cnattingius S, et al. Influenza H1N1 vaccination and adverse pregnancy outcome. *Eur J Epidemiol* 2013;**28**:579-88.
7. Håberg SE, Trogstad L, Gunnes N, et al. Risk of fetal death after pandemic influenza virus infection or vaccination. *N Engl J Med* 2013;**368**:333-40.
8. Richards JL, Hansen C, Bredfeldt C, et al. Neonatal outcomes after antenatal influenza immunization during the 2009 H1N1 influenza pandemic: impact on preterm birth, birth weight, and small for gestational age birth. *Clin Infect Dis* 2013;**56**:1216-22.
9. Oppermann M, Fritzsche J, Weber-Schoendorfer C, et al. A(H1N1)v2009: a controlled observational prospective cohort study on vaccine safety in pregnancy. *Vaccine* 2012;**30**:4445-52.
10. Conlin AM, Bukowinski AT, Sevick CJ, DeScisciolo C, Crum-Cianflone NF. Safety of the pandemic H1N1 influenza vaccine among pregnant U.S. military women and their newborns. *Obstet Gynecol* 2013;**12**:511-8.
11. Källén B, Olausson PO. Vaccination against H1N1 influenza with Pandemrix(®) during pregnancy and delivery outcome: a Swedish register study. *BJOG* 2012;**119**:1583-90.
